# Supplementary material
Source: Research Square preprint supplement (doi:10.21203/rs.3.rs-8945994/v1)
Supplement: Supplementary file 1 [file e0125285ddc6122a3fd7f5cf.docx]

**Supporting Information**

**Development of a pancreatic islet organoid platform for high-throughput drug screening for type 2 diabetes treatments**

Kyoung Jin Choi 1†, Yoon-Ju Na 1 2 3†, Jeong Hui Im 1 2, Hee Min Yoo 4 5, Won Hoon Jung1, Sung Bum Park1, Byumseok Koh1, Mi-Young Son6, Ki Young Kim 1 2 *

† These authors contributed equally to this work.

*Corresponding Author:

**Ki Young Kim**

Address: Therapeutics & Biotechnology Division, Korea Research Institute of Chemical Technology, P.O. Box 107, Yuseong-gu, Daejeon 34114, Republic of Korea

Tel: +82-42-860-7471, E-mail: [kykim@krict.re.kr](mailto:kykim@krict.re.kr)


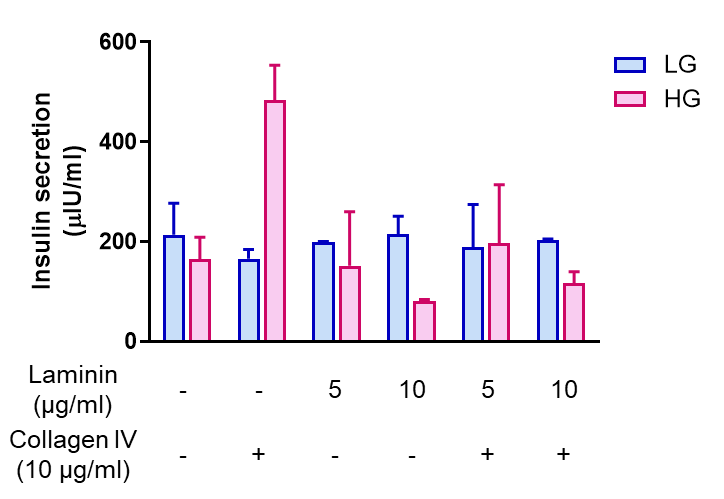


**Figure S1.** Effects of ECM components on glucose-stimulated insulin secretion in β-cell organoids

β-cell organoids were cultured in the presence of laminin (5 or 10 μg/mL) or collagen IV (10 μg/mL), and glucose-stimulated insulin secretion (GSIS) was assessed under low glucose (LG) and high glucose (HG) conditions. Insulin secretion is presented as μU/mL. Data are shown as mean ± S.D. (n = 2).

**Figure S2.** Optimization of Type 2 diabetes–inducing conditions using combinatorial metabolic and inflammatory stressors

β-cell organoids were exposed to different combinations of Type 2 diabetes–associated stressors, including free fatty acids (FFA), cytokine mixture (CM), and high glucose (HG), and the expression of β-cell–related genes was analyzed by quantitative PCR (qPCR) at the indicated time points (3, 5, and 7 days). Relative mRNA expression levels of genes associated with β-cell function (IAPP, PDX1), ER stress and apoptosis (TXNIP, sXBP1), inflammation (MCP1, IL-1β, TNF-α), oxidative stress (iNOS), and endocrine progenitor/de-differentiation marker (Ngn3) are shown. Expression levels were normalized to 18S rRNA and presented as fold change relative to control. Data are shown as mean ± S.D. (n = 2).


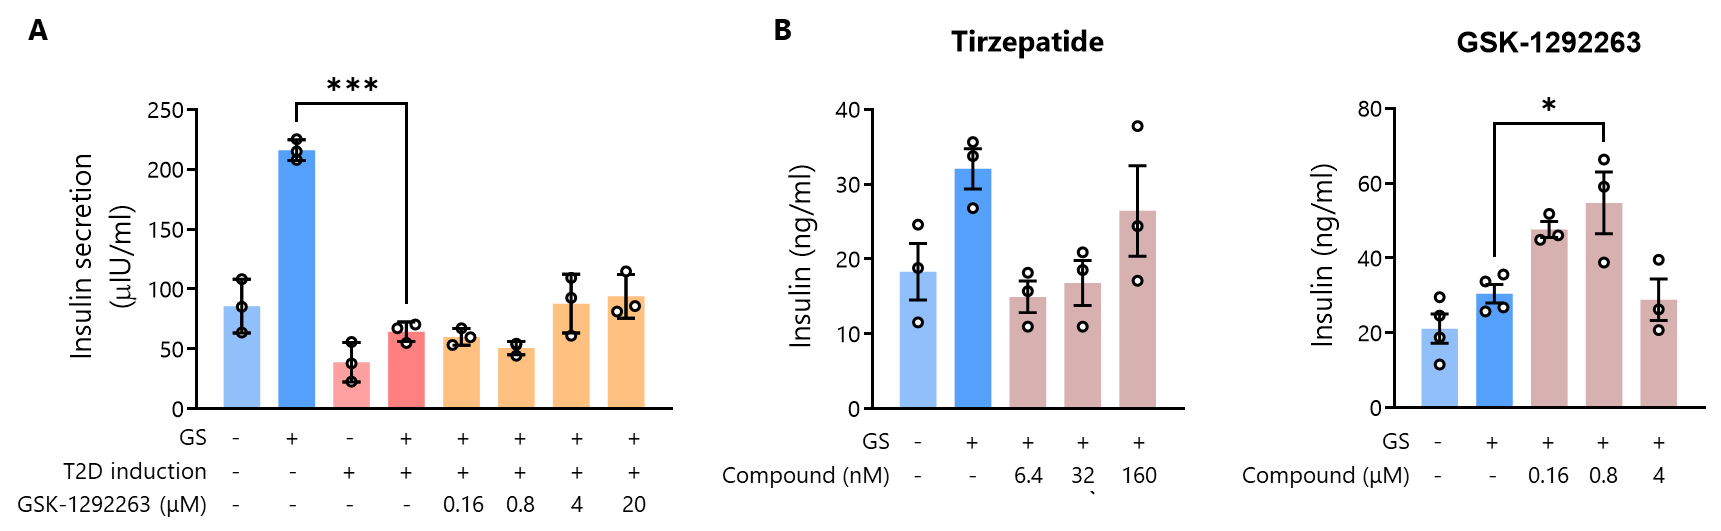


**Figure S3.** Differential insulin secretory responses to GSK-1292263 between human islet organoids and rat insulinoma cells

(A) Glucose-stimulated insulin secretion (GSIS) assay in T2D-induced human islet organoids treated with GSK-1292263 at the indicated concentrations. Insulin secretion was not significantly altered by GSK-1292263 treatment under glucose-stimulated (GS) conditions.

(B) GSIS assay in the rat insulinoma RIN-m5F cell line treated with Tirzepatide (TZP) or GSK-1292263 at the indicated concentrations. Data are presented as mean ± S.D. (n=3). Statistical significance was determined using appropriate statistical tests (* *P* < 0.05, *** *P* < 0.001).
